# Supplementary material for: Evaluation of hygroscopic cloud seeding in liquid-water clouds: a feasibility study
Source: Copernicus journal article supplement (doi:10.5194/acp-2019-408), 2019-05-15
Supplement: Supplementary file [file Evaluation of hygroscopic cloud seeding_revised manuscript.pdf › Evaluation of hygroscopic cloud seeding_revised manuscript.pdf]

# Evaluation of hygroscopic cloud seeding in liquid-water clouds: a feasibility study

Fei Wang<sup>1,2</sup>, Zhanqing Li<sup>2,3</sup>, Qi Jiang<sup>4</sup>, Gaili Wang<sup>5</sup>, Shuo Jia<sup>6</sup>, Jing Duan<sup>1</sup>, Yuquan Zhou<sup>1</sup>

<sup>1</sup> Key Laboratory for Cloud Physics, Chinese Academy of Meteorological Sciences, Beijing, 100081, China

<sup>2</sup> State Key Laboratory of Earth Surface Processes and Resource Ecology and College of Global Change and Earth System Science, Beijing Normal University, Beijing, 100875, China

<sup>3</sup> Department of Atmospheric and Oceanic Science, University of Maryland, College Park, MD 20742, USA

<sup>4</sup> National Meteorological Center, Beijing, 100081, China

<sup>5</sup> State Key Laboratory of Severe Weather, Chinese Academy of Meteorological Science, Beijing 100081

<sup>6</sup> China Huayun Group, Beijing, 100081, China

*Correspondence to:* Zhanqing Li (zli@atmos.umd.edu)

**Abstract:** An airborne cloud seeding experiment was conducted over the eastern coast of Zhejiang, China, on 4 September 2016 during a major international event held in Hangzhou. In an attempt to reduce the likelihood of rainfall onset, a major airborne experiment for weather modification took place by seeding hygroscopic agents to warm clouds to reduce cloud droplet size. The effectiveness of seeding is examined, mainly for stratiform clouds with patchy small convective cells. A radar-domain-index algorithm (RDI) was proposed to analyze the seeding effect. The threshold strategy and the tracking radar echo by correlation (TREC) technique was applied in the domain selection. Factors analyzed include echo reflectivity parameters such as the mean and maximum echo intensity, the anomaly percentage of the grid number of effective echoes, the fractional contribution to the total reflectivities, and the vertically integrated liquid water content (*VIL*) during and after the seeding process. About 12 minutes after seeding ended, the composite reflectivity of seeded clouds decreased to a minimum ( $< 10$  dBz) and the *VIL* of seeded clouds was  $\sim 0.2$  kg m<sup>-3</sup>. The echo top height dropped to  $\sim 3.5$  km, and the surface echoes were also weakened. By contrast, there was no significant variation in these echo parameters for the surrounding non-seeded clouds. The seeded cell appeared to have the shortest life cycle, as revealed by applying the cloud-cluster tracking method. The airborne Cloud Droplet Probe (CDP) measured cloud number concentration, effective diameter and liquid water content gradually increased since the cloud seeding start. This is probably caused by hygroscopic growth of agent particles and collision-coalescence of small cloud droplets. However, these parameters sampled at  $\sim 40$  min after seeding decreased significantly, which is probably due to the excessive seeding agents generated a competition for cloud water and thus suppressing cloud development and precipitation. Overall, the physical phenomenon was captured in this study, but a more quantitative in-depth analysis of the underlying principle is needed.

## 1. Introduction

Weather modification, mainly by cloud seeding, is a common technique of changing the amount or intensity of precipitation.

Cloud seeding activities include dispersing agents to a cloud by ground-based [generator](#) (Dessens, 1998), rockets (Warburton et al., 1982; Radinović and Ćurić, 2007), and aircraft (Jung et al., 2015; French et al., 2018). The seeding agents can serve as cloud condensation nuclei (CCN) to advance the collision-coalescence process in warm clouds (Jensen and Lee, 2008; Jung et al., 2015), or serve as ice nuclei (IN) to convert liquid water into ice crystals and strengthen vapor deposition, riming, and aggregation processes in super-cooled clouds. The theories behind hygroscopic and glaciogenic cloud seeding have been well documented (Schaefer, 1946; Vonnegut, 1947; Bowen, 1952), but the actual effect in practice remains highly uncertain and even controversial (Council, 2003).

Many laboratory, modeling, and field experimental studies on cloud seeding have been conducted for more than a half century, assessing the effectiveness of cloud seeding is very challenging due to notorious difficulties in gaining convincing scientific evidences. The randomized evaluation of cloud seeding based on multiple samples has been performed with relatively high support and confidence (Gagin and Neumann, 1981; Silverman, 2001). However, conducting a long-term, well-designed, and randomized cloud seeding experiment is fraught with difficulties and uncertainties (Guo et al., 2015). Relative to modeling and statistical evaluations, much fewer have been done to acquire direct observational evidences in field experiment of the effectiveness of cloud seeding (Kerr, 1982; Mather et al., 1997; Silverman, 2003). Encouraged by some recent successes (Tessendorf et al., 2012, 2018), we have attempted to investigate the effectiveness of cloud seeding by exploring different evaluation methods.

Presented here is a study of assessing the cloud seeding effect by injecting hygroscopic particles into a convective cell in a warm stratocumulus cloud for the prevention of rainfall. Hygroscopic seeding to promote the drop collision-coalescence process in liquid-water clouds has been investigated for some time (Bowen, 1952). Rosenfeld et al. (2010) concluded that hygroscopic seeding was generally guided by three conceptual models: seeding with large CCN that serve as embryos for raindrops, acceleration of the coalescence process via the competition effect, and widening of cloud drop size distribution though the tail effect. However, hygroscopic materials of different properties, different concentration and size distribution may have positive or negative responses to cloud seeding. Previous studies (Bruitjtes, 2003; Belyaeva et al., 2013) have shown that introducing a certain amount of CCN into clouds could broaden the cloud droplet spectrum at the initial stage of condensation, intensify coagulation during the formation of precipitation, and enhance the lifetime of convective clouds by changing their vertical structure. For example, flares generate giant hygroscopic particles which could shift the cloud drop size distribution toward large sizes, thereby promoting the coalescence process and enhancing precipitation (Tzivion et al., 1994; Cooper et al., 1997). A modeling study (Segal et al., 2004) showed that hygroscopic particles with diameters ( $D$ ) of 3–6  $\mu\text{m}$  are optimal for enhancing precipitation in liquid-water clouds. [Conversely, high concentrations of small hygroscopic particles may suppress precipitation \(Rosenfeld et al., 2008\) or ending up with delayed onset of precipitation \(Rosenfeld et al., 2014; Guo et al., 2016; Lee et al., 2016\).](#) The increasing CCN from anthropogenic pollution causes higher cloud drop concentration and narrower droplet spectrum, leading to suppressed drizzle formation and prolonged stratiform clouds (Bruitjtes, 2003). They also produce brighter clouds that are less efficient in precipitation (Albrecht, 1989). Some modeling studies on hygroscopic seeding have suggested similar effects, such as Yin et al. (2000) who reported that particles with  $D$  less than 2  $\mu\text{m}$  had a negative effect on

rain development in convective clouds.

Radar observation has been used to probe any changes in cloud properties after seeding (Hobbs et al., 1981; French et al., 2018). To this end, radar-based methodologies have been developed such as the Thunderstorm Identification, Tracking, Analysis and Nowcasting (TITAN, Dixon and Wiener, 1993) and Tracking Radar Echo by Correlation (TREC, Rinehart and Garvey, 1978) were used in cloud seeding experiments (Rosenfeld, 1987; Woodley and Rosenfeld, 2004). The traditional Z-R relationship for estimating rainfall has also been widely used in randomized cloud seeding experiments (Dennis et al., 1975; Cuning Jr, 1976).

China has the world's largest operational program of weather modification (Guo et al., 2015). The airborne and ground-based instrumentation has been greatly enhanced, which helped reduce the observation uncertainties. Several field experiments were conducted in recent years for more scientific identification and quantification of the cloud seeding effects (Lu and Guo, 2012; Zhu et al., 2015; Wang et al., 2019), but their effectiveness remains highly uncertain with some critical issues not being resolved yet.

The goals of this study are to evaluate any consequence of aircraft hygroscopic seeding and to develop a feasible method for analyzing the cloud seeding effect for stratocumulus clouds by:

- (a) analyzing the variability of radar parameters in nearby regions with and without seeding;
- (b) tracking and comparing the lifetime between seeded and unseeded echoes;
- (c) examining the variation of surface precipitation;
- (d) analyzing the cloud microphysics before and after cloud seeding.

## 2. Data and analysis method

### 2.1 Experimental and data description

Unlike the usual practice of cloud seeding that chiefly aims at triggering and enhancing rainfall, our seeding was intended for suppressing rainfall by using hygroscopic agents. A series of field experiments were conducted off the eastern coast of Zhejiang during August and September 2016. A ground-based Doppler S-band radar deployed at Zhoushan (122.11°E, 30.07°N, ~438 m above sea level) provided useful information for identification of seeding echoes. The volume scan pattern (VCPs) was the standard mode of precipitation observation in six-minute intervals and a minimum elevation angle of about 0.5°. A twin turboprop (Modern Ark 60, MA-60) research aircraft was responsible for cloud seeding, that was equipped with in situ probes to measure aerosol, cloud, and rainfall particles that are integrated in a system developed by the Droplet Measurement Technologies Inc. (DMT), provided cloud microphysical observations. The aircraft-mounted cloud physics probe relevant to this study is the Cloud Droplet Probe (CDP) which resolves cloud drops with D ranging from 2 to 50  $\mu\text{m}$ . Details about the uncertainties of the CDP and the CDP-estimated liquid water content (LWP) in liquid-water clouds have been described in other studies (Lance et al., 2010, 2012; Faber et al., 2018). Air temperature was also measured to ascertain if a cloud is in

liquid phase. The typical speed of the aircraft is  $60\text{--}70\text{ m s}^{-1}$  during the cloud seeding and cloud microphysics sampling operations. The frequency of data acquisition is 1-Hz in this study.

The hygroscopic cloud seeding agent used in the experiment was the ZY-1NY flare developed by Shannxi Zhongtian Rocket Technology. The combustion product of ZY-1NY flares primarily consists of potassium chloride ( $KCl$ ) and calcium chloride ( $CaCl_2$ ) which leads to the formation of accumulation- and coarse-mode hygroscopic aerosols ( $D > 0.5\text{ }\mu\text{m}$ ) in the shape of salt aggregates. The agent was set to disperse the hygroscopic particles at a rate of  $\sim 4.4 \times 10^{13}\text{ s}^{-1}$  under laboratory conditions. For hygroscopic particles larger than  $D > 0.5\text{ }\mu\text{m}$ ,  $D > 0.9\text{ }\mu\text{m}$ , and  $D > 2\text{ }\mu\text{m}$ , we estimate that  $\sim 4.0 \times 10^{11}$ ,  $\sim 6.0 \times 10^{10}$ , and  $\sim 2.0 \times 10^{10}$  hygroscopic particles were emitted per second, respectively. Table 1 gives details about the technical parameters of the ZY-1NY cloud seeding flare.

Marine stratocumulus clouds were observed off the coast of eastern Zhejiang on 4 September 2016. Figure 1a shows the cloud image of Himawari-8 at visible channel ( $0.47\text{ }\mu\text{m}$ ) at 0300 UTC. There was a wide range stratiform cloud over eastern China, and a severe tropical storm (Typhoon Namtheun, NO. 1612) located near Yatsushiro Sea. By the co-work of these two systems, a weak easterly wave was developing off the east coast of Zhenjiang. Inhomogeneity internal structure within a low-level cloud deck was captured from satellite image. The cloud showed apparently dual-layer structure over experimental region. The wide range continental cloud of 8~12 km height was dominated by west wind, however, the easterly wave cloud, which mainly blow  $\sim 4\text{ km}$  height, was dominated by east wind (figure 1b and S1). From cloud optical depth (COD) of satellite image in figure 1c, the large values of COD mainly contributed by the low-level cloud.

Real-time Himawari-8 satellite and ground-based radar images were used to identify cloud decks for cloud seeding purposes.

As our focus is on hygroscopic seeding, sounding data can help us monitor the vertical structure of atmosphere and identify liquid-water clouds. As a part of radiosonde observational network operated by China Meteorological Administration (CMA), Shanghai ( $121.44^\circ\text{E}$ ,  $31.40^\circ\text{N}$ ;  $\sim 150\text{ km}$  north of the experiment area), Hangzhou ( $120.16^\circ\text{E}$ ,  $30.25^\circ\text{N}$ ;  $\sim 150\text{ km}$  west of the experiment area), and Taizhou ( $121.41^\circ\text{E}$ ,  $28.62^\circ\text{N}$ ;  $\sim 150\text{ km}$  south of the experiment area) provide fine-resolution measurements of temperature, relative humidity, wind speed and direction. The uncertainties of relative humidity and temperature measured by radiosonde are addressed in the supplement material. Routine meteorological measurements, especially rain gauge data of hourly precipitation, made by the CMA are also used. Together, they provided information on the state of the atmosphere and cloud properties that are critical to the seeding experiment and the design of the sampling flight pattern in and out of clouds. The MA-60 aircraft seeded the clouds along a circular trajectory  $\sim 5\text{ km}$  in diameter centered at  $\sim 121.8^\circ\text{E}$ ,  $29.8^\circ\text{N}$ . Eight ZY-1NY flares were burned in the middle part of the cloud (1900 -2200 m). Since the mean wind direction was northeasterly at the seeding altitude, the seeded cloud exposed to burned flares moved toward the southwest. The aircraft sampled the seeded cloud about 15 minutes after the seeding was completed so that the seeding effect could be studied. Figure 2 shows the flight track of the aircraft and the sampling position of the seeded cloud.

## 2.2 Radar-domain-index (RDI) algorithm

The ground-based S-band radar and airborne CDP data were analyzed for evaluating the efficacy of cloud seeding. Since there was a sufficient amount of water vapor in the lower atmosphere of the experimental region on 4 September 2016, the cloud seeding region was mainly covered by stratiform clouds with patchy small convective cells. The RDI method based on radar grid data is proposed to analyze the cloud seeding effect.

The radar grid data used by the radar-domain-index (RDI) method are from the Doppler Weather Radar 3D Digital Mosaic System (RDMS, Wang et al, 2009). Quality control was performed on the reflectivity data to remove electronic interference, ground clutter, and anomalous propagations. The 3D Cartesian-gridded reflectivity data were then interpolated in the spherical coordinate system (Wang et al., 2012, 2013). The interpolation method is a nearest-neighbor scheme on the range-azimuth plane combined with a linear interpolation in the vertical direction. This method has proved to be a sound scheme that retains high-resolution structures comparable to the raw data (Xiao et al., 2008). Based on high spatial-temporal resolution 3D mosaic reflectivity data, several radar features were obtained from the RDMS: the radar constant altitude plan position indicator (*CAPPI*), composite reflectivity (*CR*), and vertically integrated liquid (*VIL*). The vertical resolution of *CAPPI* was 500 m, and the horizontal resolution was  $0.01^\circ \times 0.01^\circ$  ( $\sim 1 \text{ km} \times 1 \text{ km}$ ). The temporal resolution was six minutes.

The effect of cloud seeding was analyzed following the RDI method that is based on radar echo parameters before and after seeding over the same or different areas, depending on the motion of the seeded clouds. For example, assuming that a strong echo in the black rectangle is a seeded cloud, three domains can be defined: Domain A as the effective detection scope of the Doppler radar (Figure 3a), Domain B as the possible influence area of the seeded cloud based on the diffusion of agents by wind and the motion of the seeding plume (Figure 3b), and Domain C as a movable region which represents the seeding echoes at a particular time (Figure 3c). In Domain C, a threshold value of reflectivity and the TREC technique (Rinehart and Garvey, 1978; Tuttle and Gall, 1999) are performed to identify and track the motion of the seeded echo, and the echo parameters in this domain are also calculated. Details about the TREC method are provided in the supplementary document.

Typical parameters related to the seeding evaluation by the RDI method include echo size, duration, and intensity. This study presents statistical analyses of the reflectivity pixels of the seeded clouds and the variation in *CAPPI* at the height of the seeding layer. Since the seeding altitude was  $\sim 2 \text{ km}$  and taking the vertical diffusion of hygroscopic particles into consideration, five levels of gridded *CAPPI* data are selected (from 1000 to 3000 m in 500-m intervals). Quantities calculated at each level include the anomaly percentage of the grid number of effective echoes ( $\sigma$ ), the maximum and mean echo intensity ( $ref\_max$  and  $ref\_mean$ ), and the fractional contribution to the total reflectivities ( $FCR_i$ ). *VIL* in the three domains are also calculated.

Although the RDI method could be used to evaluate the effect of cloud seeding by analyzing the variation in the echo parameters over a wide area during and after the seeding, it still has some limitations. For example, the targeted cloud should ideally be stratiform with an embedded convective core, and the echo parameters of Domains A and B are better to be homogeneous and linearly fluctuate to obtain stable systematic movement during the period of study so that the data have good consistency and small standard deviations. Additionally, the targeted cloud must be seeded as sufficiently as possible.

## 2.3 Echo-cluster tracking and identification algorithm

For comparisons with the RDI results, an echo-cluster tracking and identification algorithm was launched to evaluate the seeding effect. As a physical testing method, the algorithm was applied to track the seeded echo and surrounding non-seeded echoes for comparative analyze, which is similar to the TITAN algorithm (Wang et al., 2019). A reflectivity threshold was defined to ensure that the life history of these echoes could be objectively and completely characterized. The meteorological and topographical similarity were also required while selecting echoes for comparison. Radar parameters such as echo top height, echo volume, maximum reflectivity were calculated to tracking the echo evolution. Variation of these parameters were analyzed to determine the effectiveness of cloud seeding. Details about the algorithm and uncertainties have been described elsewhere (Rosenfeld, 1987; Dixon and Wiener, 1993; Woodley and Rosenfeld, 2004).

## 3. Result and discussion

### 3.1 Evaluation by RDI algorithm

Raw data from the Zhoushan-based S-band Doppler Radar were obtained as input to the RDI algorithm to evaluate the efficacy of cloud seeding. Through analyzing the Shanghai, Hangzhou, and Taizhou's sounding data on 0600 UTC, we calculated the wind speed and direction at the altitude of seeding layer (Figure S1). By taking into consideration of the change of wind field during and after cloud seeding, the direction in which the target radar echo moved and its speed were approximated. Table 2 defines the domains for evaluation purposes.

Figure 4 shows the time series of  $\sigma$  and  $ref\_mean$ . There is no significant variance in  $\sigma$  ( $\pm 1.59\%$ ), and the  $ref\_mean$  is  $\sim 9.1$  dBz ( $\pm 0.3$  dBz) in Domain A during the intensive operation period (0300~0448 UTC), but  $\sigma$  shows a gradual reduction in domain B ( $-15.02\%$ ) and C ( $-25.25\%$ ). Especially in Domain C,  $\sigma$  value dramatically decreased after cloud seeding ended. Similarly, the  $ref\_mean$  of Domain B and C fell to  $\sim 8$  dBz at 0400 UTC, which was even lower than the background value ( $ref\_mean$  of Domain A). The variation of echo intensity in Domain B and C is beyond that caused by natural variability (Domain A), which can be concluded that cloud seeding played a significant role in it. From another side, this comparison of  $\sigma$  and  $ref\_mean$  in the three domains suggests that the cloud seeding of an individual convective cell embedded in a widespread stratiform cloud contributes little to the natural variability of radar echoes at large scales. The dissipation of the seeded cloud, as evidenced by the variation in  $\sigma$  and  $ref\_mean$  in Domain B and C, is preliminarily considered the result of excessive seeding by hygroscopic particles.

Figure 5 shows the time series of the fractional contribution to the total reflectivities ( $FCR_i$ , where  $i$  represents the  $i$ th reflectivity bin:  $\leq 0$  dBz,  $0-10$  dBz,  $10-20$  dBz,  $20-30$  dBz,  $\geq 30$  dBz) in Domain A, B, and C. The  $FCR_i$  in these domains can be compared to assess differences in ranges. There was little variation in reflectivity across all bins in Domain A (Figure 5). About 80% of the grid points in this domain had reflectivity values between 10 and 30 dBz. However,  $FCR_{(20dBz < i < 30dBz)}$  and  $FCR_{(i \geq 30dBz)}$  decreased gradually over time in Domain B and C. In particular, after cloud seeding,  $FCR_{(i \geq 30dBz)}$  decreased to a

minimum ( $\sim 0\%$ ) in Domain C. The influence of cloud seeding on  $FCR_{(10\text{dBz} < i < 20\text{dBz})}$  is not significant. The time series of  $FCR_{(i < 10\text{dBz})}$  show different trends: an almost invariant trend in domain A (between 58.2% and 62.6%), a slight increasing trend in domain B (from 48% to 66%), and a stronger increasing trend in domain C (from 27% to 69%). These results suggest that cloud seeding effectively weakens the development of strong echoes ( $> 20\text{ dBz}$ ). Meanwhile, accompanied by the seeding process, the appearance of weak echoes ( $< 10\text{ dBz}$ ) increases.

The cloud layer in the lower troposphere moved from the northeast to the southwest. The cloud seeding started at 0336 UTC, and a corresponding maximum reflectivity of over  $\sim 35\text{ dBz}$  was seen (Figure 6a). From the vertical cross-section along the violet line in Figure 6a, there were strong echoes near the surface, and the echo top height was  $\sim 4.2\text{ km}$  (Figure 6c). As the seeding operation continued,  $CR$  and  $VIL$  decreased in varying degrees, and the targeted cloud gradually dissipated (see Figures S3 and S4). About 12 min after seeding ended (0418 UTC),  $CR$  decreased to a minimum ( $\sim 10\text{ dBz}$ ) and  $VIL$  was  $\sim 0.2\text{ kg m}^{-3}$  (Figure 6e). The echo top height dropped to  $\sim 3.5\text{ km}$ , and the surface echoes also weakened.

### 3.2 Evaluation by echo-cluster tracking and identification algorithm

Besides the RDI method, an echo-cluster tracking and identification algorithm was applied to evaluate seeding efficacy. The echo volumes and mean  $CR$  from 0100 to 0600 UTC, i.e., the three-hour period around the seeding time, were examined to identify convective cells in Domain A. Using a reflectivity threshold of  $CR$  ( $\sim 19\text{ dBz}$ ), four other cells were identified (Figure 7).

Figure 8 shows the time series of echo volumes and mean  $CR$ s of the four unseeded cells. Both time series show the evolution and echo intensities of these cells. The mean  $CR$ s of the identified cells are roughly the same (the seeded cell is  $\sim 26.2\text{ dBz}$ , and the mean value of the other identified cells is  $\sim 25.2\text{ dBz}$ ). However, the seeded cell appears to have the shortest life cycle ( $\sim 1\text{h } 6\text{min}$ ) compared with the other unseeded cells (mean value of the four cells is  $\sim 1\text{h } 46\text{min}$ ).

### 3.3 Hourly variability of surface precipitation

The end result of cloud seeding often is associated with the variation of surface precipitation. If rainfall occurred, the surface echoes might weaken (red ovals in Figure 6) due to a natural process of cloud depletion. But from the echo-cluster tracking result between seeded and unseeded cells in Section 3.3, we can conclude that the seeded echo was weakened at the fastest speed and have the shortest life cycle. Figure 9 shows the rainfall distribution over cloud seeding region during 0200-0500 UTC, and the different values between them. The inhomogeneous feature of this precipitation event was also seen. The rain gauge data used in study consist of hourly precipitation with a space interval of  $\sim 10\text{ km}$ . Hourly precipitation during cloud seeding (0300-0400 UTC) with a maximum  $\sim 5.8\text{ mm}$  was stronger than that before (0200-0300 UTC) and after (0400-0500 UTC) cloud seeding. There were  $\sim 23$  rain gauges with effective precipitation record (hourly precipitation  $\geq 0.1\text{mm}$ ) at 0400-0500 UTC, which was approximately one half of that at 0300-0400 UTC ( $\sim 44$  rain gauges). To better see the contrast of surface



precipitation caused by cloud seeding, the interpolated  $0.01^\circ \times 0.01^\circ$  precipitation fields were constructed from site measurements to produce a time series of precipitation for each grid square. From the grid difference of precipitation between 0300-0400 UTC and 0400-0500 UTC, cloud seeding seems to have led a decrease in precipitation from seeded cloud relative to the surrounding clouds (Figure 9d).

On the other hand, it seems that the precipitation peaked at 0300-0400 UTC from the analysis of cloud life cycle using radar echo in section 3.3. The decrease of surface precipitation is probably due to a natural process of cloud depletion. However, according to the seeding time, extent and dosage in this experiment, the hygroscopic seeding could just change the cloud number concentration and size distribution in a very limited scope. Besides, cloud seeding is a chain of physical process, similar to cloud-precipitation process in nature, and it influences surface precipitation through a complex mechanism. From our comparative analysis, its development was restrained and its life cycle was shortened, which was also demonstrated by analyzing our airborne cloud micro-physics data (section 3.4). Actually, an increase in surface precipitation was observed in the domain following cloud seeding. We thus consider it was a necessary but insufficient condition for the evaluation.

### 3.4 Microphysical characteristics of the seeded cloud

Generally, Radar data can provide information about large hydrometeors such as raindrops. However, the hygroscopic flare used in this seeding experiment was mostly comprised of submicron and micro-hygroscopic particles (Table 1) which could directly affect the concentration and spectrum of cloud droplets. Calibrated airborne CDP measurements can provide such information about cloud droplets. Table 3 summarizes the microphysical characteristics of the targeted cloud during the various seeding periods (black box in Figure 2) and post-seeding sampling of the cloud layer (black oval in Figure 2). Stages I, II, and III represent the cloud seeding periods with an average flight altitude of 1875–1975 m, and stage IV represents the post-seeding sampling period when the aircraft flew through the seeded cloud again on its return to base. The mean flight altitude during stage IV was ~2200 m.

The cloud droplet number concentration ( $N_c$ ), the effective diameter ( $ED$ ), the liquid water content ( $LWC$ ), and the cloud droplet spectral dispersion ( $\epsilon$ ) increased in progression from stage I to stage III. The maximum  $N_c$  increased from  $216.7 \text{ cm}^{-3}$  to  $322.4 \text{ cm}^{-3}$ , and the mean  $LWC$  increased from  $0.4 \text{ g m}^{-3}$  to  $0.8 \text{ g m}^{-3}$ . Affected by hygroscopic particles,  $N_c$  showed a bimodal size distribution (peaks at 4–6  $\mu\text{m}$  and 17–18  $\mu\text{m}$ ) during the seeding period (Figure 10). Large amounts of small particles (likely agent particles) were captured in the initial stage of cloud seeding (see the black arrow in the uppermost left-hand panel of Figure 10). Considering the potential hygroscopic growth of agent particles, the cloud number concentration of the first peak diminished and the second peak gradually increased. The spectrum also confirms that larger-mode (corresponding to second peak) particles were increased but showed slowing growth (17.9 $\mu\text{m}$  to 18.2 $\mu\text{m}$ ) from ED information in stage II and III. It can be concluded that some of the hygroscopic particles grow to cloud drops, even raindrops, through collision-coalescence process. But most of the agent particles were accumulated at 17–18 $\mu\text{m}$  by hygroscopic growth and hardly continues grow even bigger, which could be explained by the competition effect of water vapor. The  $N_c$ ,  $ED$  and  $LWC$  were much lower



and the drop size distribution was broadened of the seeded cloud during post-seeding sampling, likely because the seeding agents became progressively more dilute as the particles grow by condensation or dissipate by turbulent motion. More in-depth quantitative analyses are needed to examine this.

#### 4. Conclusions

5 The goal of this study is to evaluate the potential effect of hygroscopic seeding on cloud and precipitation processes for the sake of suppressing rainfall during a weather modification experiment around the southeastern coast of Zhejiang province in China. A marine stratocumulus cloud deck with a large horizontal extent was observed off the coast of eastern Zhejiang on 4 September 2016. Hygroscopic flares were dispersed into an appropriate region of the targeted cloud by an MA-60 research aircraft. Real-time satellite images, radar data, and airborne CDP observations were all acquired to help identify cloud  
10 conditions suitable for cloud seeding. After seeding, the research aircraft flew into seeded cloud to measure cloud microphysical parameters.

Analysis of the differences in numerous cloud and rainfall parameters before and after seeding is a means for assessing the effect of the hygroscopic agents introduced into a convective cell embedded in a stratiform cloud. The marine stratocumulus clouds chosen in this study are under an enrichment condition of plentiful of water vapor, favorable for cloud development  
15 with rich CCN. By introducing hygroscopic agents into a small region of the targeted cloud and comparing its evolution with surrounding clouds in the same cloud regime, the role that other factors may have in modifying the cloud can be minimized so that the influence of cloud seeding can be singled out. A method for estimating the effectiveness of the seeding based on various parameters of radar echoes is presented. It is demonstrated that cloud seeding had altered the course of cloud development and their parameters, and suppressed precipitation.

20 An RDI algorithm based on radar grid data was proposed to analyze the cloud seeding effect. Echo tracking method including TREC technique and threshold strategy were performed for domain selection. Echo reflectivity parameters such as *ref\_mean*,  $\sigma$ , and  $FCR_i$  were analyzed during and after the seeding process to examine any spatial differences. Results show that about 12 min after seeding, the composite reflectivity of the seeded cloud decreased to a minimum ( $< 10$  dBz), and the *VIL* of the seeded cloud was  $\sim 0.2$  kg m<sup>-3</sup>. The echo top height dropped to  $\sim 3.5$  km, and the surface echoes were also weakened. By contrast, there  
25 was no significant variation in the echo parameters of non-seeded clouds. The RDI results suggest that the hygroscopic seeding effectively weakened the development of strong echoes ( $> 20$  dBz). After cloud seeding, the area of weak echoes ( $< 10$  dBz) increased. The seeded echo had the shortest lifetime compared with the neighboring unseeded echoes identified by a cloud-cluster tracking and identification algorithm. From airborne CDP measurement during cloud seeding, a small number of hygroscopic particles grow to cloud drops and raindrop through collision-coalescence process. However, most of the agent  
30 particles were accumulated at 17-18  $\mu$ m by hygroscopic growth and hardly continue bigger, presumably due to the competition effect of water vapor. It seems plausible that hygroscopic seeding creates competition mechanism and limits cloud development, thus suppresses precipitation.

5 It is admitted that this is just a case study with a certain degree of coincidence, from which we may hardly draw any solid conclusion that the change was totally due to seeding effect **rather than** natural variation. More observational evidences are certainly needed. They are, however, very costly and difficult to acquire especially in densely populated regions where access of aerospace is usually extremely difficult to gain in order to fly into the right clouds at the right time. In this regard, the case as studied here is an invaluable sample that is worth exploring.

*Data availability.* All observations data used in this study are available. Readers can access the data directly or by contacting Fei Wang via [feiwang@cma.gov.cn](mailto:feiwang@cma.gov.cn).

10 *Author contribution.* F. Wang and Y. Zhou designed the aircraft campaign; F. Wang, G. Wang analyzed the radar data; F. Wang, Q. Jiang, J. Duan and S. Jia analyzed satellite, rain gauge and airborne data; F. Wang and Z. Li wrote the paper.

15 *Acknowledgements.* This study was supported by National Key Research and Development Program of China (2016YFA0601701 and 2017YFC1501702) and the National Science Foundation of China (91544217). We are very grateful to the reviewers for their constructive comments and thoughtful suggestions. We also thank all of the experimental research team, especially the flight crew of CMA's MA-60 airplane. The observational data used in this paper for radar, precipitation, radiosonde can be accessed from the website <http://data.cma.cn/>. The airborne data of the field experiment also available. Readers can access the data by contacting [feiwang@cma.gov.cn](mailto:feiwang@cma.gov.cn).

## References

- Albrecht, B. A.: Aerosols, cloud microphysics, and fractional cloudiness, *Science*, 245, 1227-1231, 1989.
- Belyaeva, M., Drofa, A., and Ivanov, V.: Efficiency of stimulating precipitation from convective clouds using salt powders, *Izvestiya, Atmospheric and Oceanic Physics*, 49, 154-161, 2013.
- 5 Bowen, E.: A new method of stimulating convective clouds to produce rain and hail, *Quarterly Journal of the Royal Meteorological Society*, 78, 37-45, 1952.
- Bruintjes, R.: Similarities between the effects of hygroscopic seeding and anthropogenic pollution on clouds, 8th WMO Scientific Conference on Weather Modification, Casablanca, Morocco, 2003,
- Cooper, W. A., Bruintjes, R. T., and Mather, G. K.: Calculations pertaining to hygroscopic seeding with flares, *Journal of Applied Meteorology*, 36, 1449-1469, 1997.
- 10 Council, N. R.: Critical Issues in Weather Modification Research, The National Academies Press, Washington, DC, 143 pp., 2003.
- Cunning Jr, J. B.: Comparison of the ZR relationships for seeded and nonseeded Florida cumuli, *Journal of Applied Meteorology*, 15, 1121-1125, 1976.
- 15 Dennis, A., Koscielski, A., Cain, D., Hirsch, J., and Smith Jr, P.: Analysis of radar observations of a randomized cloud seeding experiment, *Journal of Applied Meteorology*, 14, 897-908, 1975.
- Dessens, J.: A physical evaluation of a hail suppression project with silver iodide ground burners in southwestern France, *Journal of Applied Meteorology*, 37, 1588-1599, 1998.
- Dixon, M., and Wiener, G.: TITAN: Thunderstorm identification, tracking, analysis, and nowcasting—A radar-based methodology, *Journal of atmospheric and oceanic technology*, 10, 785-797, 1993.
- 20 Faber, S., French, J. R., and Jackson, R.: Laboratory and in-flight evaluation of measurement uncertainties from a commercial Cloud Droplet Probe (CDP), *Atmospheric Measurement Techniques*, 11, 3645-3659, 2018.
- French, J. R., Friedrich, K., Tessendorf, S. A., Rauber, R. M., Geerts, B., Rasmussen, R. M., Xue, L., Kunkel, M. L., and Blestrud, D. R.: Precipitation formation from orographic cloud seeding, *Proceedings of the National Academy of Sciences*, 201716995, 2018.
- 25 Gagin, A., and Neumann, J.: The second Israeli randomized cloud seeding experiment: Evaluation of the results, *Journal of Applied Meteorology*, 20, 1301-1311, 1981.
- Guo, J., Deng, M., Lee, S. S., Wang, F., Li, Z., Zhai, P., Liu, H., Lv, W., Yao, W., and Li, X.: Delaying precipitation and lightning by air pollution over the Pearl River Delta. Part I: Observational analyses, *Journal of Geophysical Research: Atmospheres*, 121, 6472-6488, 2016.
- 30 Guo, X., Fu, D., Li, X., Hu, Z., Lei, H., Xiao, H., and Hong, Y.: Advances in cloud physics and weather modification in China, *Advances in atmospheric sciences*, 32, 230-249, 2015.

- Hobbs, P. V., Lyons, J. H., Locatelli, John D., Biswas, K. R., Radke, L. F., Weiss, R. R., and Rangno, A. L.: Radar Detection of Cloud-Seeding Effects, *Science*, 213, 1250-1252, 10.1126/science.213.4513.1250, 1981.
- Jensen, J. B., and Lee, S.: Giant sea-salt aerosols and warm rain formation in marine stratocumulus, *Journal of the atmospheric sciences*, 65, 3678-3694, 2008.
- 5 Jung, E., Albrecht, B. A., Jonsson, H. H., Chen, Y.-C., Seinfeld, J. H., Sorooshian, A., Metcalf, A. R., Song, S., Fang, M., and Russell, L. M.: Precipitation effects of giant cloud condensation nuclei artificially introduced into stratocumulus clouds, *Atmospheric Chemistry and Physics*, 15, 5645-5658, 2015.
- Kerr, R. A.: Cloud seeding: one success in 35 years, *Science*, 217, 519-521, 1982.
- Lance, S., Brock, C., Rogers, D., and Gordon, J. A.: Water droplet calibration of the Cloud Droplet Probe (CDP) and in-flight  
10 performance in liquid, ice and mixed-phase clouds during ARCPAC, *Atmospheric Measurement Techniques*, 3, 1683-1706, 2010.
- Lance, S.: Coincidence errors in a cloud droplet probe (CDP) and a cloud and aerosol spectrometer (CAS), and the improved performance of a modified CDP, *Journal of Atmospheric and Oceanic Technology*, 29, 1532-1541, 2012.
- Lee, S. S., Guo, J., and Li, Z.: Delaying precipitation by air pollution over the Pearl River Delta: 2. Model simulations, *Journal  
15 of Geophysical Research: Atmospheres*, 121, 11,739-711,760, 2016.
- Lu, G., and Guo, X.: Distribution and origin of aerosol and its transform relationship with CCN derived from the spring multi-aircraft measurements of Beijing Cloud Experiment (BCE), *Chinese Science Bulletin*, 57, 2460-2469, 10.1007/s11434-012-5136-9, 2012.
- Mather, G., Terblanche, D., Steffens, F., and Fletcher, L.: Results of the South African cloud-seeding experiments using  
20 hygroscopic flares, *Journal of applied meteorology*, 36, 1433-1447, 1997.
- Radinović, D., and Ćurić, M.: A specific evidence of hail suppression effectiveness in Serbia, *The Journal of Weather Modification*, 39, 74-75, 2007.
- Rinehart, R., and Garvey, E.: Three-dimensional storm motion detection by conventional weather radar, *Nature*, 273, 287,  
1978.
- 25 Rosenfeld, D.: Objective method for analysis and tracking of convective cells as seen by radar, *Journal of Atmospheric and Oceanic Technology*, 4, 422-434, 1987.
- Rosenfeld, D., Lohmann, U., Raga, G. B., O'Dowd, C. D., Kulmala, M., Fuzzi, S., Reissell, A., and Andreae, M. O.: Flood or drought: how do aerosols affect precipitation?, *science*, 321, 1309-1313, 2008.
- Rosenfeld, D., Axisa, D., Woodley, W. L., and Lahav, R.: A quest for effective hygroscopic cloud seeding, *Journal of Applied  
30 Meteorology and Climatology*, 49, 1548-1562, 2010.
- Rosenfeld, D., Sherwood, S., Wood, R., and Donner, L.: Climate effects of aerosol-cloud interactions, *Science*, 343, 379-380, 2014.
- Schaefer, V. J.: The production of ice crystals in a cloud of supercooled water droplets, *Science*, 104, 457-459, 1946.
- Segal, Y., Khain, A., Pinsky, M., and Rosenfeld, D.: Effects of hygroscopic seeding on raindrop formation as seen from

simulations using a 2000-bin spectral cloud parcel model, *Atmospheric Research*, 71, 3-34, 2004.

Silverman, B. A.: A critical assessment of glaciogenic seeding of convective clouds for rainfall enhancement, *Bulletin of the American Meteorological Society*, 82, 903-924, 2001.

5 Silverman, B. A.: A critical assessment of hygroscopic seeding of convective clouds for rainfall enhancement, *Bulletin of the American Meteorological Society*, 84, 1219-1230, 2003.

Tessendorf, S. A., Bruintjes, R. T., Weeks, C., Wilson, J. W., Knight, C. A., Roberts, R. D., Peter, J. R., Collis, S., Buseck, P. R., and Freney, E.: The Queensland cloud seeding research program, *Bulletin of the American Meteorological Society*, 93, 75-90, 2012.

10 Tessendorf, S. A., French, J. R., Friedrich, K., Geerts, B., Rauber, R. M., Rasmussen, R. M., Xue, L., Ikeda, K., Blestrud, D. R., and Kunkel, M. L.: A transformational approach to winter orographic weather modification research: The SNOWIE Project, *Bulletin of the American Meteorological Society*, 2018.

Tuttle, J., and Gall, R.: A single-radar technique for estimating the winds in tropical cyclones, *Bulletin of the American Meteorological Society*, 80, 653-668, 1999.

15 Tzivion, S., Reislin, T., and Levin, Z.: Numerical simulation of hygroscopic seeding in a convective cloud, *Journal of Applied Meteorology*, 33, 252-267, 1994.

Vonnegut, B.: The nucleation of ice formation by silver iodide, *Journal of applied physics*, 18, 593-595, 1947.

Wang, G., Liu, L., and Ding, Y.: Improvement of radar quantitative precipitation estimation based on real-time adjustments to ZR relationships and inverse distance weighting correction schemes, *Advances in Atmospheric Sciences*, 29, 575-584, 2012.

20 Wang, G., Wong, W., Liu, L., and Wang, H.: Application of multi-scale tracking radar echoes scheme in quantitative precipitation nowcasting, *Advances in Atmospheric Sciences*, 30, 448-460, 2013.

Wang, H., Liu, L., Wang, G., Zhuang, W., Zhang, Z., and Chen, X.: Development and application of the Doppler weather radar 3-D digital mosaic system, *Journal of Applied Meteorological Science*, 20, 241-224, 2009.

25 Wang, W., Yao, Z., Guo, J., Tan, C., Jia, S., Zhao, W., Zhang, P., and Gao, L.: The extra-area effect in 71 cloud seeding operations during winters of 2008–14 over Jiangxi Province, East China, *Journal of Meteorological Research*, 33, 528-539, 2019.

Warburton, J., Linkletter, G., and Stone, R.: The use of trace chemistry to estimate seeding effects in the National Hail Research Experiment, *Journal of Applied Meteorology*, 21, 1089-1110, 1982.

30 Woodley, W. L., and Rosenfeld, D.: The development and testing of a new method to evaluate the operational cloud-seeding programs in Texas, *Journal of Applied Meteorology*, 43, 249-263, 2004.

Xiao, Y., Liu, L., and Shi, Y.: Study of Methods for Three-Dimensional Multiple-Radar Re ctivity Mosaics, *Journal of Meteorological Research*, 22, 351-361, 2008.

Zhu, S., Guo, X., Lu, G., and Guo, L.: Ice crystal habits and growth processes in stratiform clouds with embedded convection examined through aircraft observation in northern China, *Journal of the Atmospheric Sciences*, 72, 2011-2032, 2015.

5

**Table 1.** Technical parameters of the ZY-1NY cloud seeding flare. (The information of ZY-1NY flare was mainly extracted from <http://www.zthj.com/product/info/11>)

| Combustion product of<br>Hygroscopic Flare | Agent<br>dosage | Combustion<br>time | Seeding rate            |                         |                         |                         |
|--------------------------------------------|-----------------|--------------------|-------------------------|-------------------------|-------------------------|-------------------------|
|                                            |                 |                    | All                     | D >0.5μm                | D>0.9μm                 | D>2μm                   |
| KCl, CaCl <sub>2</sub>                     | 1.2 kg          | 15–18 min          | 4.4×10 <sup>13</sup> /s | 4.0×10 <sup>11</sup> /s | 6.0×10 <sup>10</sup> /s | 2.0×10 <sup>10</sup> /s |

**Table 2.** Definition of domains for the RDI method.

| Domain | Dimension | Item                                           | Feature   |
|--------|-----------|------------------------------------------------|-----------|
| A      | 4°×4°     | Effective detection scope of the radar         | Immovable |
| B      | 0.5°×0.5° | Possible region affected by cloud seeding      | Immovable |
| C      | 0.1°×0.1° | Target echo corresponding to the seeding cloud | Movable   |

10

**Table 3.** Statistics (mean and maximum values) of airborne CDP-measured microphysical parameters (cloud droplet number concentration  $N_c$ , effective diameter  $ED$ , liquid water content  $LWC$ , and cloud droplet spectral dispersion  $\varepsilon$ ) on 4 September 2016 for seeding and post-seeding legs at approximately the cloud seeding height.

| Stage | Status   | Altitude | $N_c$ (cm <sup>-3</sup> ) |       | $ED$ (μm) |      | $LWC$ (g kg <sup>-1</sup> ) |     | $\varepsilon$ |     |
|-------|----------|----------|---------------------------|-------|-----------|------|-----------------------------|-----|---------------|-----|
|       |          |          | Mean                      | Max   | Mean      | Max  | Mean                        | Max | Mean          | Max |
| I     | Seeded   | 1975.4   | 86.2±54.1                 | 216.7 | 15.0±6.6  | 26.2 | 0.4±0.3                     | 1.9 | 0.2±0.1       | 0.4 |
| II    | Seeded   | 1875.4   | 76.5±53.2                 | 240.1 | 17.9±2.4  | 25.0 | 0.6±0.4                     | 2.2 | 0.3±0.1       | 0.5 |
| III   | Seeded   | 1874.6   | 119.6±103.5               | 322.4 | 18.2±4.1  | 23.4 | 0.8±0.7                     | 2.8 | 0.3±0.1       | 0.5 |
| IV    | Unseeded | 2202.9   | 38.1±12.5                 | 57.1  | 14.1±1.7  | 26.4 | 0.2±0.1                     | 0.4 | 0.4±0.1       | 0.6 |

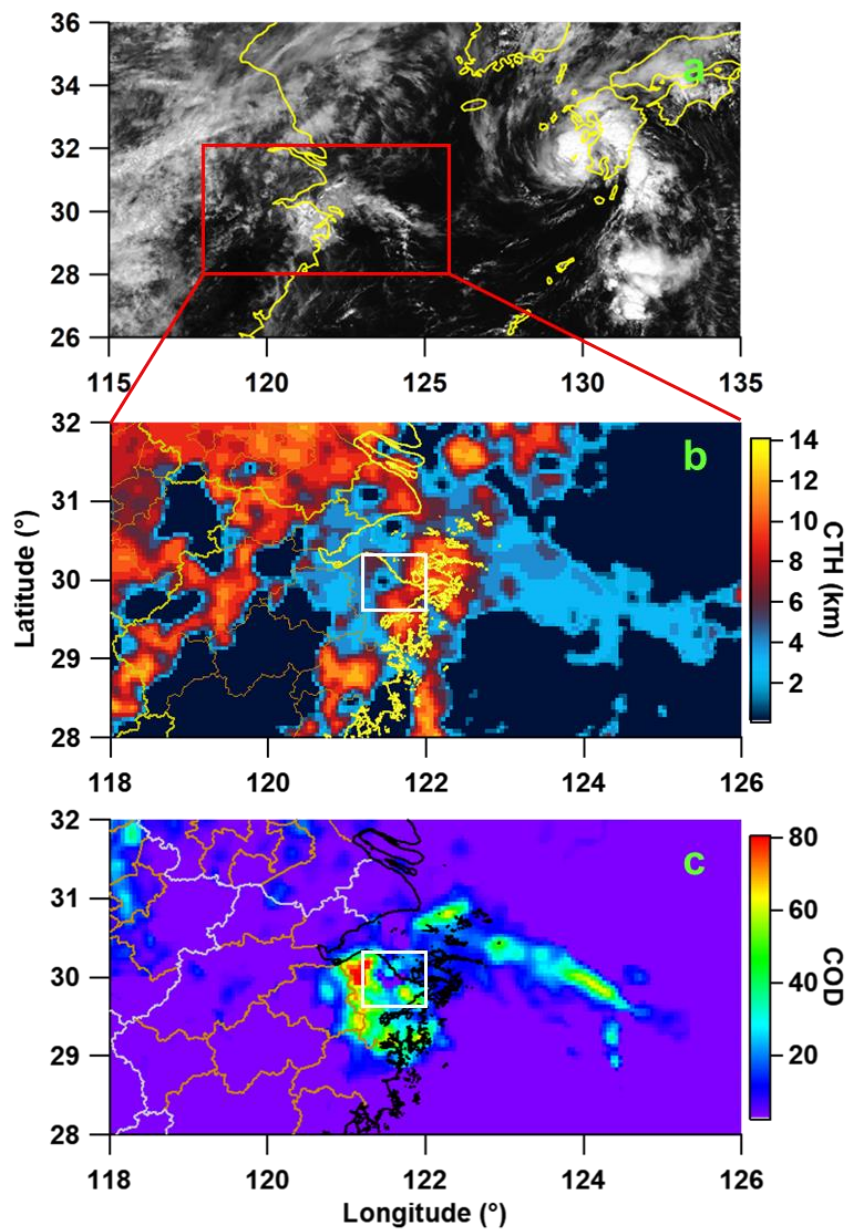

**Figure 1.** Cloud image of Himawari-8 at visible channel (a), cloud top height (b), and cloud optical depth (c) at 0300 UTC. The rectangles in b and c indicate the experimental region.



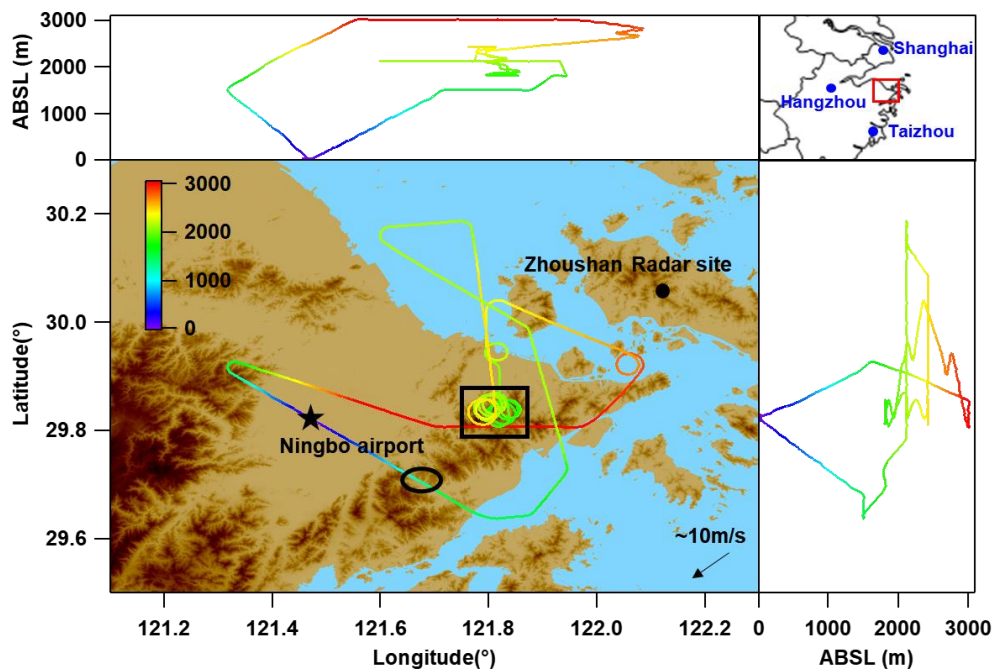

**Figure 2.** Geographical location of the experimental region (top right: the red box denotes the flight region, the blue spots denote the Shanghai, Hangzhou, and Taizhou radiosonde station) and the flight track of the research flight (top left and bottom right subplots indicates the flight profile along longitude and latitude). The black box shows the area of cloud seeding, and the black oval shows the area where post-seeding observations of the seeded clouds were made.

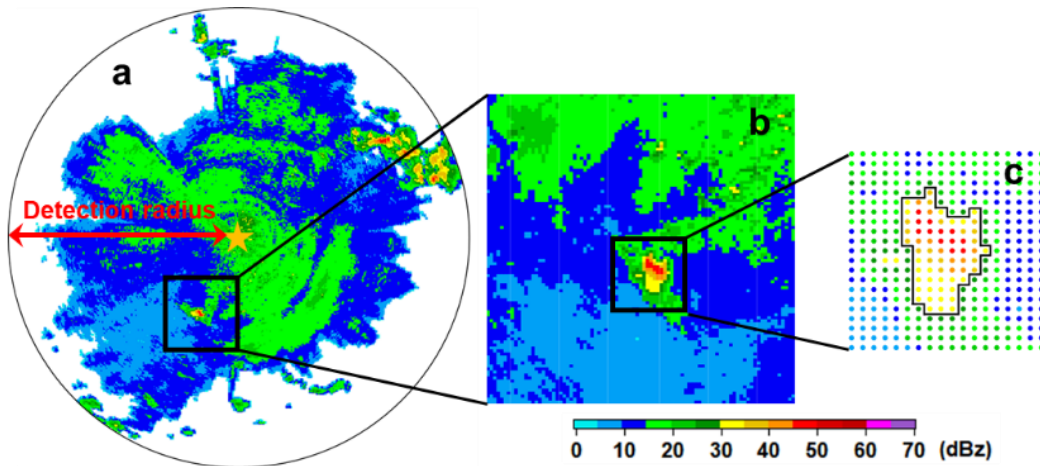

**Figure 3.** Schematic diagrams showing how the RDI method selects a domain. Take single radar as example. (a) The background radar echo field is defined as Domain A. The orange star shows the location of the radar site. The effective detection scope (corresponding to Domain A) is  $\sim 5^\circ \times 5^\circ$ . (b) The black rectangle outlines Domain B, representing a  $\sim 0.5^\circ \times 0.5^\circ$  or  $\sim 1^\circ \times 1^\circ$  polluted region that was affected by seeding agents based on the motion of the seeded cloud or seeding plumes. (c) Domain C is a movable region using the threshold strategy and the TREC technique. The background field (Domain A) and the polluted region (Domain B) could be adjusted according to the scope of the seeding plume such as the regional mosaic reflectivity field retrieved by multiple radars.

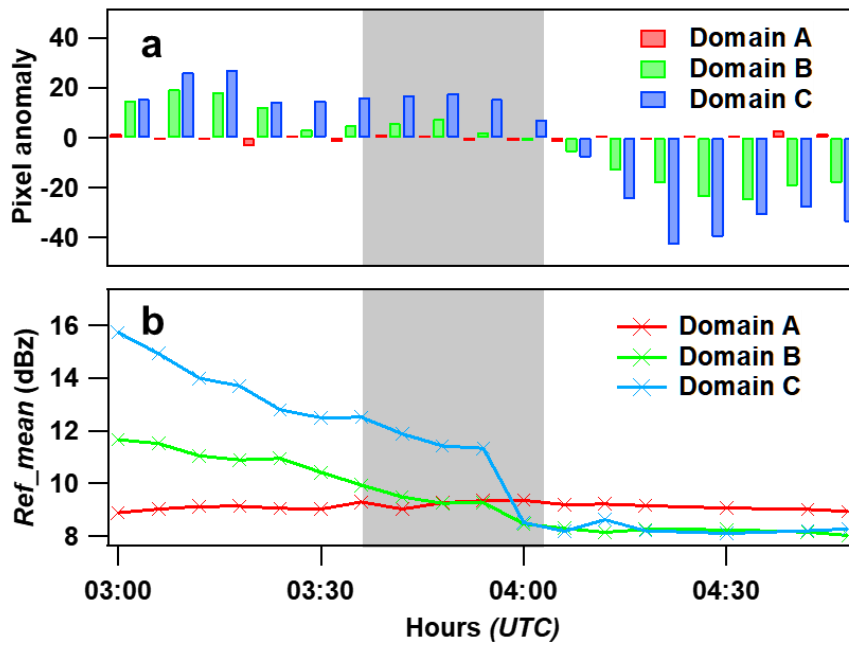

**Figure 4.** Time series of (a) the anomaly percentage of grid number of effective echoes and (b) mean echo intensity (*ref\_mean*) in Domain A, B, and C. The five CAPPI levels are considered. Gray shaded areas show when cloud seeding was done.

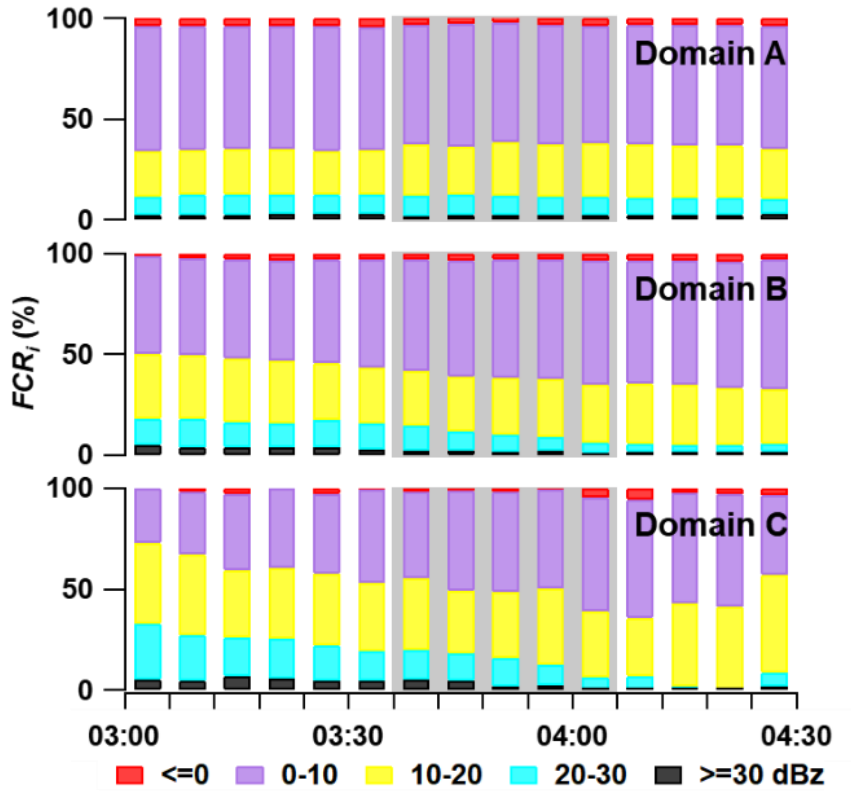

**Figure 5.** Time series of the fractional contribution to the total reflectivities ( $FCR_i$ , where  $i$  represents the  $i$ th reflectivity bin:  $\leq 0$  dBz, 0–10 dBz, 10–20 dBz, 20–30 dBz,  $\geq 30$  dBz) in Domain A, B, and C. The five CAPPI levels are considered. Gray shaded areas show when cloud seeding was done.

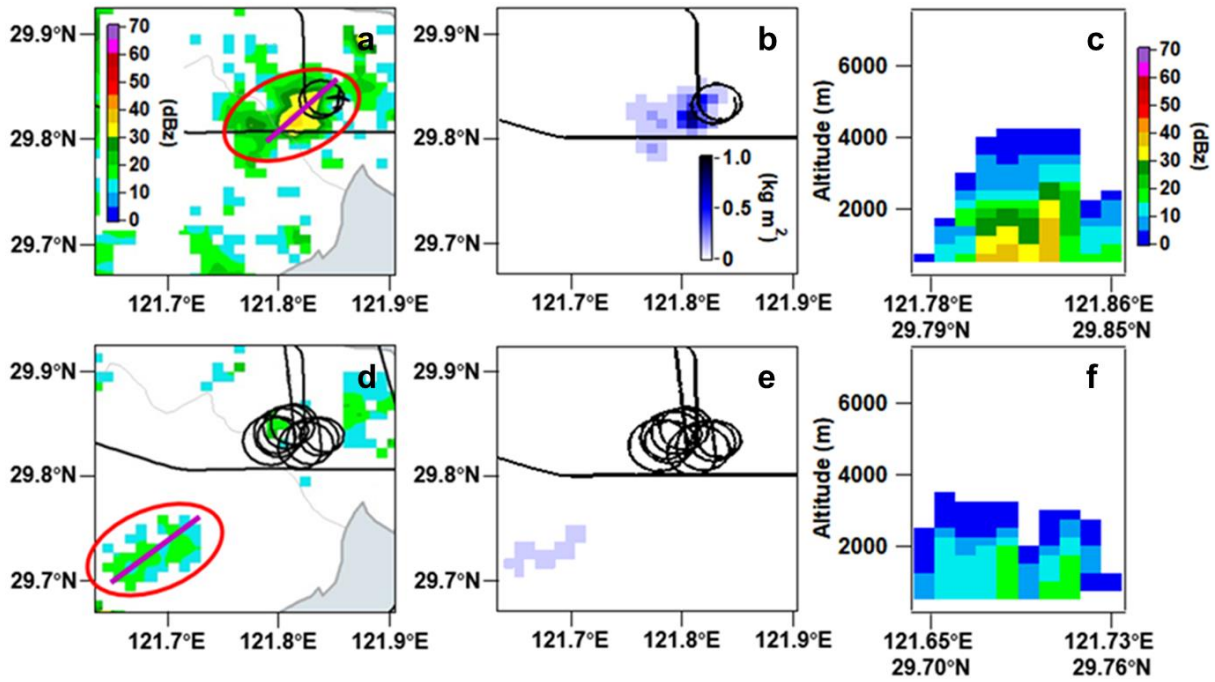

**Figure 6.** (a,d) Composite reflectivity from the five levels (1000–3000 m in 500-m intervals), (b,e) vertically integrated liquid water content, and (c,f) vertical cross-section [along the violet lines in (a,d)] of the seeding echo. The top panels are for the start of cloud seeding (0336 UTC), and the bottom panels are for 12 min after the end of seeding (0418 UTC). The red ovals in (a,d) outline the seeding cloud, and the black lines show the flight tracks. To clearly show the seeding cloud in (a,d), weak echoes ( $< 10$  dBZ) are rejected.

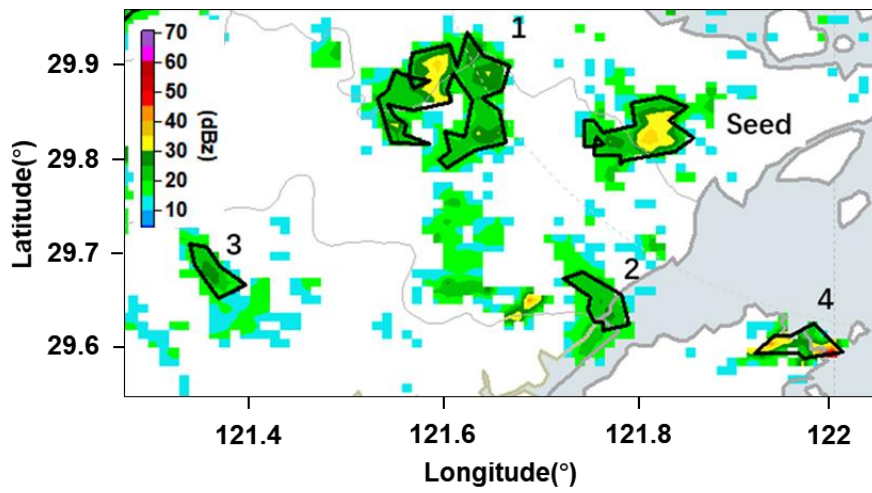

**Figure 7.** Composite reflectivity of the seeded cell and other cells identified by the cloud cluster algorithm at 0336 UTC (cell numbers 1–4). The reflectivity threshold is ~19 dBZ. To clearly show identified cells, weak echoes (< 10 dBZ) are rejected.

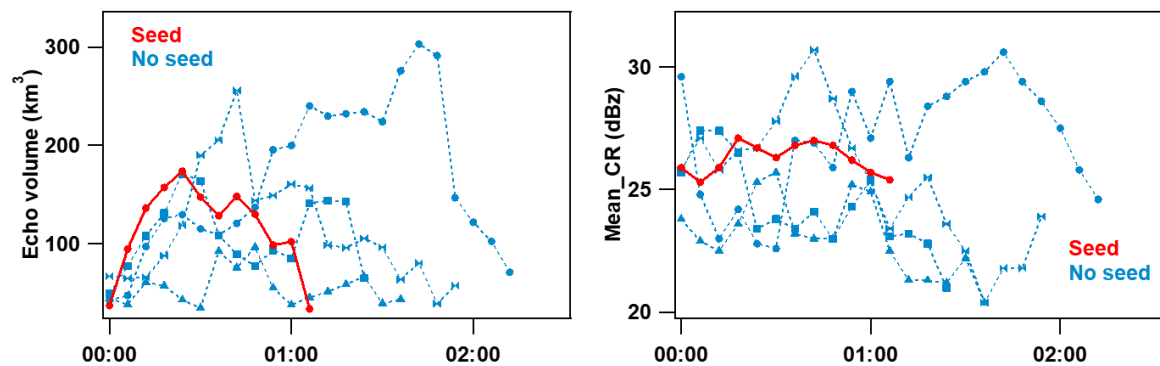

**Figure 8.** Echo volume (left panel) and mean composite reflectivity (right panel) of identified cells (including seeded and unseeded cells). All sampling cells are normalized to the same initial time on the x-axis.



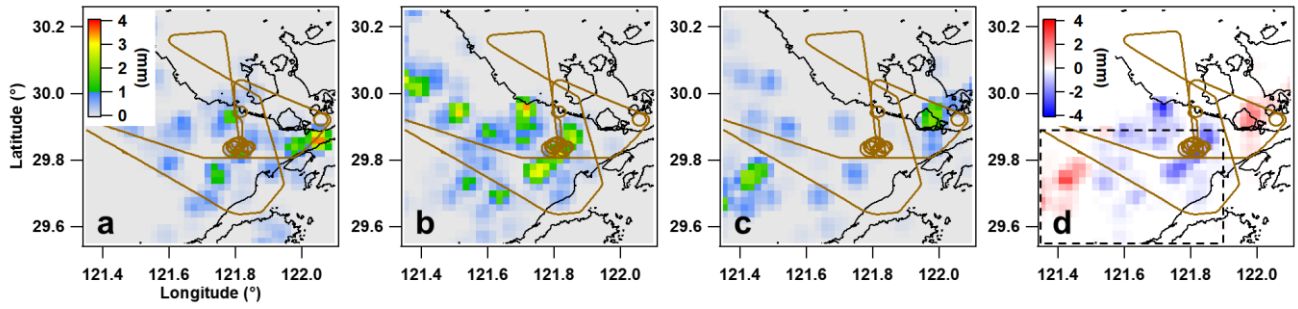

**Figure 9.** Hourly surface precipitation at 0200-0300 UTC (a), 0300-0400 UTC (b), and 0400-0500 UTC (c), which approximately corresponds to before, during, and after cloud seeding. The rightmost panel (d) indicates the grid difference of precipitation between 0300-0400 UTC and 0400-0500 UTC.

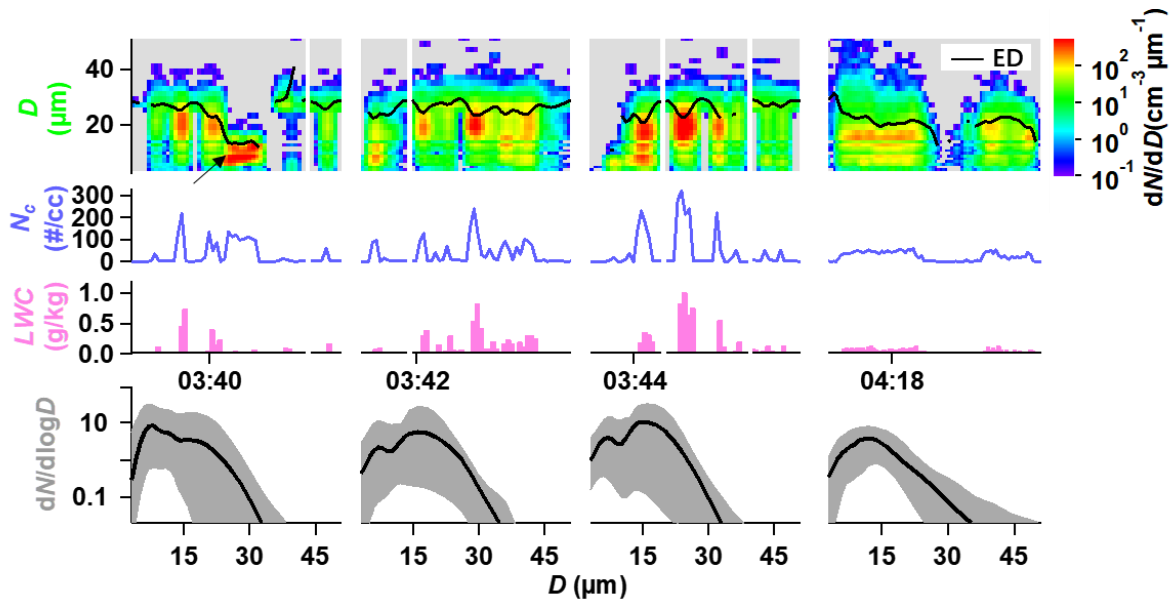

**Figure 10.** Top three rows: The time series of (row 1) cloud number size distribution ( $dN/dD$ ; color shaded) and effective diameter (ED; black solid line), (row 2) cloud droplet number concentration ( $N_c$ ), and (row 3) liquid water content ( $LWC$ ). Bottom row: Mean spectrum during the flight through the seeded cloud measured by an aircraft-mounted CDP. Black lines represent the means and the gray shaded areas represent the 10th and 90th percentiles of the data. The first three columns from the left represent the seeding period (corresponding to the black box in Figure 2) and the rightmost column represents the period when the aircraft flew through the seeded cloud again on its return to base (corresponding to the black oval in Figure 2).
