# Supplementary material for: Evaluation of hygroscopic cloud seeding in liquid-water clouds: a feasibility study
Source: Copernicus journal article supplement (doi:10.5194/acp-2019-408), 2019-05-15
Supplement: Supplementary file [file Response To Reviewers2.pdf › Response To Reviewers2.pdf]

## Anonymous Referee #2:

We sincerely appreciate for your careful review of our paper. The comments and suggestions you gave are very helpful for us to improve our study. Below are our point-by-point responses (in black) to all your comments (in green) and the corresponding changes in the revised manuscript are highlighted in blue.

### Major comments:

- 1. Major findings are derived from ground-based radar data and aircraft-based CDP measurements, which is valuable to the scientific community. Given that Himawari is new-generation geostationary satellite which provides cloud observations at 10-min intervals, Figure 1b-c is a good case in point. I am wondering whether the authors can show any images of post-seeding, in order to provide circumstantial evidence for the argument of “The echo top height dropped to ~3.5 km”. Are there any changes in the cloud top height as observed from Himawari? I think this addition and related discussion will make this paper more convincing.*

According to your suggestion, we analyzed cloud top height (CTH) before, during and after cloud seeding from satellite image (figure 1), trying to find any evidence of CTH change by cloud seeding. Unfortunately, due to the dual-layer of cloud structure (see figure1 in the manuscript and S1), the seeded cloud was a small convective cell which was totally shaded by the upper-layer cloud. It was displayed as few pixels in the satellite image, from which one can hardly give any helpful information.

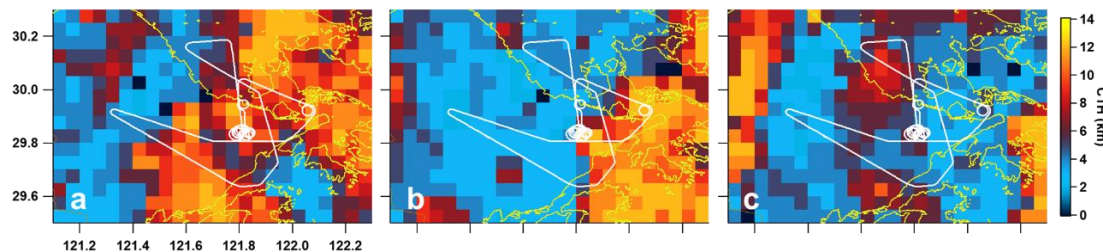

Figure 1 Cloud top height (CTH) of Himawari-8 at 0300 (a), 0400 (b), and 0500 (c), which cloud represent CTH before seeding, seeding, and post-seeding approximately.

- 2. The organization of this manuscript needs to be substantially changed. It is customary to put “methods” together with “data” rather than with “results”. Therefore, sections 3.1 and 3.3 are advised to be moved to section 2. On top of it, the title of section 3 can be revised to “Results and discussion”. As such, more discussion is required in analyzing the observational results to enhance its readership.*

Per the suggestions (very good!), the title of section 2 and section 3 were revised to “Data and analysis method” and “Results and discussion”. Correspondingly, we added “2.1 Experimental and data description”, “2.2 Radar-domain-index (RDI) algorithm”, “2.3 Echo-cluster tracking and identification algorithm” as sub-section of section 2. More specific discussions on “Evaluation by echo-cluster tracking and identification algorithm” and “Hourly variability of

surface precipitation” were added. The corresponding changes in the revised manuscript have been highlighted in blue.

3. *Sections 3.4, and 3.5: In the domain with cloud seeding, it seems to me that the precipitation peaked at 0300-0400 UTC from the perspective of life cycle of the stratocumulus clouds analyzed here. This will undoubtedly result in the expected results shown here. It is therefore supposed to add some discussion in this regard.*

We agree and the following discussion was added to section 3.3 in the revised manuscript.

“On the other hand, it seems that the precipitation peaked at 0300-0400 UTC from the analysis of cloud life cycle using radar echo in section 3.3. The decrease of surface precipitation is probably due to a natural process of cloud depletion. However, according to the seeding time, extent and dosage in this experiment, the hygroscopic seeding could just change the cloud number concentration and size distribution in a very limited scope. Besides, cloud seeding is a chain of physical process, similar to cloud-precipitation process in nature, and it influences surface precipitation through a complex mechanism. From our comparative analysis, its development was restrained and its life cycle was shortened, which was also demonstrated by micro-physical analysis from our airborne data. Actually, surface precipitation was observed no longer increasing in the domain following cloud seeding. We thus consider it a necessary but insufficient condition for the evaluation.”

#### **Minor comments:**

1. *Page 1 Line 26: Several grammar errors in “This probably because the hygroscopic growth by agent particles and collision-coalescence by small cloud...”*

We have revised this as “This is probably caused by hygroscopic growth of agent particles and collision-coalescence of small cloud droplets.”

2. *Page 1 Line 26: There is a typo here. “is” is missing in “which probably”*

It has been corrected in the revised manuscript.

3. *Page 2 Line 1: something is missing after “ground-based”*

We have revised it as “ground-based generator”.

4. *Page 2 Line 30: the author may consider to add “ending up with delayed onset of precipitation (Rosenfeld et al., 2014; Guo et al., 2016; Lee et al., 2016)” following “precipitation (Rosenfeld et al., 2008).”*

It has been added in the revised manuscript.

5. *Page 3 Lines 7-8: It is advised to mention several most recent assessment studies conducted in China used ground-based radar and aircraft measurements, including Wang et al. 2019. J. Meteor. Res., doi: 10.1007/s13351-019-8122-1.*

It has been added in the revised manuscript.

6. *Page 4 Lines 14-16: The three radiosonde sites are part of radiosonde observational network operated by CMA, which is supposed to be mentioned here. Also, the*

*uncertainties of humidity and temperature are needed to be discussed, given they have been used to derive the vertical structures of clouds.*

They have been added in the revised manuscript.

There are two meanings of the uncertainties, the instrument itself and the algorithm of cloud identification. I think both of them were important in discussing cloud vertical structure. So, we add the following description in Section 1 in the supplement material.

In this study, we use RH profiles derived from sounding data, to analyze the vertical structure of clouds. First of all, the accuracy of RH from radiosonde observation is particularly important. The L-band sounding system, measured once per second, was widely used in operational radiosonde stations in China since 2002 (Zhang et al., 2016; Guo et al., 2016). The GTS1 digital electronic sensor, one of the key components of the L-band sounding system, provides fine-resolution profiles of temperature, pressure, RH, wind speed and direction at least twice a day to monitor the vertical profiles of atmospheric thermodynamic condition. Comparisons between GTS1 and Vaisala RS80 from previous studies indicated adequate agreements in the troposphere, but a lot larger biases in the upper atmosphere (Bian et al., 2011). Compared with Vaisala RS92, GTS1 sensor was found to yield a systematic dry bias in the order of 10% below 500 hPa. The GTS1 sensor showed a delayed response or a lag effect after the humidity changes rapidly like going through a cloud layer (Li et al., 2009).

Accurate identification of clouds by using sounding data is also import to this study. The method we choose may seriously affect the result. Three widely used algorithms have been employed to determine the locations of cloud layers and their boundaries from radiosonde observations, including:

- a. Dewpoint temperature depressions below certain threshold (Poore et al., 1995);
- b. Cloud detection method based on  $T(z)$  and  $RH(z)$ , which are the second-order derivatives of temperature and RH with respect to height, respectively (Chernykh and Eskridge, 1996).
- c. RH thresholding method (Wang and Rossow, 1995), i.e.  $RH_{\max} > 87\%$ ,  $RH_{\min} > 84\%$ , a RH jump at cloud base and cloud top; (here after WR95)

The main uncertainty of WR95 method is that it tends to misclassify moist, cloud-free layers as clouds. To avoid this, an improved algorithm was proposed by using W-band cloud radar, ceilometer and satellite observation (Wang et al., 1999; Zhang et al., 2010). In this study we use the WR95 method to determine cloud vertical structure, with the RH threshold being set to  $>84\%$  according to the findings from previous inter-comparison studies (Zhou and Ou, 2010).

**7. Page 5 Line 11: “which pending”-> “depending”**

It has been corrected in the revised manuscript.

**8. Page 5 Line 31: 0600 UTC?**

Yes, the radiosonde was launched at 0600 UTC, it has been corrected in the revised manuscript.

**9. Page 7 Line 10: “as”->”at”**

It has been corrected in the revised manuscript.

**10. Page 8 Lines 19-20: “Radiosonde soundings, real-time satellite images, and airborne CDP observations were all acquired to help identify cloud conditions suitable for cloud seeding.” is misleading, especially for the purpose of radiosonde. I noticed in the supplementary materials, the authors used 0600 UTC, which was -3 hrs after cloud seeding.**

As the reviewer noted, sounding data are helpful in identifying cloud vertical structure after the experiment. Our original statement was indeed misleading that was thus deleted in the revised manuscript.

**11. Page 9 Line 12: “not”-> “rather than” or “instead”**

has been corrected in the revised manuscript.

**12. The authors may consider to revise the x-axis title from “Time series” in Figures 4 and 8 to “Hours (UTC)”**

It has been revised in the revised manuscript.

**13. The caption in Figure 9: “consider” is advised to be changed to “corresponds to”; “right graph” is advised to be changed to “rightmost panel”**

It has been corrected in the revised manuscript.
